# Supplementary material for: Prevalence of diabetes and pre-diabetes in Sri Lanka: a new global hotspot–estimates from the Sri Lanka Health and Ageing Survey 2018/2019
Source: PubMed Central journal article supplement — BMJ Open Diabetes Res Care. 2023 Feb 16;11(1):e003160. doi: 10.1136/bmjdrc-2022-003160 (PMC9936281; doi:10.1136/bmjdrc-2022-003160), 2023-02-16
Supplement: bmjdrc-2022-003160supp001.pdf [file bmjdrc-2022-003160supp001.pdf]

## **SUPPLEMENTARY MATERIAL**

**Table S 1. Characteristics of study sample used for diabetes prevalence estimation, SLHAS 2018/19 diabetes sample (unweighted sample and weighted percentage).**

**Table S 2. Crude prevalence of previously diagnosed diabetes, undiagnosed diabetes, total diabetes, and proportion of total diabetes that is undiagnosed in Sri Lankan adults by additional sociodemographic characteristics, SLHAS 2018/19**

**Table S 3. Crude prevalence of diabetes in Sri Lankan adults by age group and sex, SLHAS 2018/2019.**

**Table S 4. Crude prevalence of previously diagnosed diabetes, total diabetes using both FPG and OGTT, and proportion of total diabetes that is undiagnosed in Sri Lankan adults by district, SLHAS 2018/19.**

**Table S 5. Crude prevalence of IFG, IGT, total pre-diabetes, and total diabetes and pre-diabetes in Sri Lankan adults by additional sociodemographic characteristics, SLHAS 2018/19.**

**Figure S 1. Flowchart of subject selection and contribution of subsamples to prevalence estimates.**

**Text S 1. Estimation of household socioeconomic status using principal components analysis**

**Text S 2. STROBE checklist of items that should be included in reports of cross-sectional studies.**

**Table S 1. Characteristics of study sample used for diabetes prevalence estimation, SLHAS 2018/19 diabetes sample (unweighted sample and weighted percentage).**

| Sample characteristics | Unweighted N | Unweighted % / Mean (SD) | Weighted % / Mean (SD) | Reference value |
|------------------------|--------------|--------------------------|------------------------|-----------------|
| <b>Age (Mean)</b>      | 6,661        | 50.1 (17.2)              | 43.9 (16.7)            | -               |
| 18–29                  | 969          | 14.5                     | 25.1                   | 25.1            |
| 30–39                  | 1,130        | 17.0                     | 20.8                   | 20.8            |
| 40–49                  | 1,179        | 17.7                     | 18.0                   | 18.0            |
| 50–59                  | 1,157        | 17.4                     | 16.2                   | 16.2            |
| 60–69                  | 1,151        | 17.3                     | 11.6                   | 11.6            |
| 70–79                  | 877          | 13.2                     | 6.1                    | 6.1             |
| 80+                    | 198          | 3.0                      | 2.1                    | 2.1             |
| <b>Sex</b>             |              |                          |                        |                 |
| Male                   | 3,265        | 49.0                     | 47.6                   | 47.6            |
| Female                 | 3,396        | 51.0                     | 52.4                   | 52.4            |
| <b>Ethnicity</b>       |              |                          |                        |                 |
| Sinhala                | 4,703        | 70.6                     | 74.9                   | 74.9            |
| Tamil                  | 1,504        | 22.6                     | 15.3                   | 15.3            |
| Muslim                 | 428          | 6.4                      | 9.5                    | 9.5             |
| Other                  | 26           | 0.4                      | 0.3                    | 0.3             |
| <b>Religion</b>        |              |                          |                        |                 |
| Buddhist               | 4,379        | 65.7                     | 69.1                   | -               |
| Hindu                  | 1,140        | 17.1                     | 12.1                   | -               |
| Muslim                 | 428          | 6.4                      | 9.4                    | -               |
| Christian              | 646          | 9.7                      | 8.3                    | -               |
| Other                  | 68           | 1.0                      | 1.1                    | -               |
| <b>Education</b>       |              |                          |                        |                 |
| No formal schooling    | 255          | 3.9                      | 2.9                    | -               |
| Primary education      | 927          | 14.0                     | 10.0                   | -               |
| Secondary education    | 2,391        | 36.2                     | 36.6                   | -               |
| Passed O-level         | 1,632        | 24.7                     | 26.3                   | -               |
| Passed A-level         | 1,127        | 17.1                     | 19.8                   | -               |
| Degree and above       | 270          | 4.1                      | 4.5                    | -               |
| <b>Sector</b>          |              |                          |                        |                 |
| Urban                  | 2,024        | 30.4                     | 19.6                   | 19.6            |
| Rural                  | 3,657        | 54.9                     | 70.6                   | 70.6            |
| Estate                 | 170          | 2.6                      | 0.7                    | 0.7             |
| Rural/Estate           | 810          | 12.2                     | 9.2                    | 9.2             |
| <b>Province</b>        |              |                          |                        |                 |
| Western                | 1,431        | 21.5                     | 30.0                   | 30.0            |
| Central                | 976          | 14.7                     | 12.5                   | 12.5            |
| Southern               | 851          | 12.8                     | 12.3                   | 12.3            |
| Northern               | 691          | 10.4                     | 5.0                    | 5.0             |

|                                                |       |              |              |      |
|------------------------------------------------|-------|--------------|--------------|------|
| Eastern                                        | 553   | 8.3          | 6.8          | 6.8  |
| North-Western                                  | 548   | 8.2          | 11.7         | 11.7 |
| North-Central                                  | 477   | 7.2          | 6.1          | 6.1  |
| Uva                                            | 467   | 7.0          | 6.1          | 6.1  |
| Sabaragamuwa                                   | 667   | 10.0         | 9.7          | 9.7  |
| <b>Household SES quintile</b>                  |       |              |              |      |
| Poorest                                        | 1,571 | 23.6         | 19.6         | 20.0 |
| Poorer                                         | 1,331 | 20.0         | 19.9         | 20.0 |
| Middle                                         | 1,238 | 18.6         | 19.9         | 20.0 |
| Richer                                         | 1,225 | 18.4         | 20.3         | 20.0 |
| Richest                                        | 1,296 | 19.5         | 20.3         | 20.0 |
| <b>Area SES tertile</b>                        |       |              |              |      |
| Least developed                                | 2,407 | 36.1         | 33.2         | 33.3 |
| Middle                                         | 1,905 | 28.6         | 33.6         | 33.3 |
| Most developed                                 | 2,349 | 35.3         | 33.2         | 33.3 |
| <b>Body mass index (Mean)</b>                  | 6,583 | 23.8 (4.6)   | 23.9 (4.7)   | -    |
| <b>WHO BMI categories (kg/m<sup>2</sup>)</b>   |       |              |              |      |
| Underweight (<18.5)                            | 818   | 12.4         | 12.3         | -    |
| Normal (18.5–24.9)                             | 3,305 | 50.2         | 48.7         | -    |
| Overweight (25.0–29.9)                         | 1,857 | 28.2         | 29.4         | -    |
| Obese (≥30)                                    | 603   | 9.2          | 9.5          | -    |
| <b>Asian BMI categories (kg/m<sup>2</sup>)</b> |       |              |              |      |
| Underweight (<18.5)                            | 818   | 12.4         | 12.3         | -    |
| Normal (18.5–22.9)                             | 2,196 | 33.4         | 32.2         | -    |
| Overweight (23.0–24.9)                         | 1,109 | 16.8         | 16.5         | -    |
| Obese (≥25)                                    | 2,460 | 37.4         | 38.9         | -    |
| <b>Fasting plasma glucose (mg/dL)</b>          | 6,485 | 110.7 (45.2) | 109.3 (46.1) | -    |
| <b>Diagnosed diabetics</b>                     | 1,174 | 17.6         | 14.3         | -    |
| <b>Taking antidiabetic medication</b>          | 865   | 13.6         | 10.8         | -    |

*Notes:* The weighted estimates use the national weights as described in the main text. In the sector categorization, rural/estate refers to subjects from PSUs that were a mix of rural and estate sector households. Population reference values for age, sex, ethnicity, and sector taken from the 2012 national census statistics adjusted for estimated demographic change during 2012–2019.

**Table S 2. Crude prevalence of previously diagnosed diabetes, undiagnosed diabetes, total diabetes, and proportion of total diabetes that is undiagnosed in Sri Lankan adults by additional sociodemographic characteristics, SLHAS 2018/19**

|                         | Diagnosed diabetes | Undiagnosed diabetes |                 |                     | Total diabetes (diagnosed and undiagnosed by FPG or OGTT) | Proportion of total diabetes that is undiagnosed§ |
|-------------------------|--------------------|----------------------|-----------------|---------------------|-----------------------------------------------------------|---------------------------------------------------|
|                         |                    | FPG†                 | OGTT‡           | Total (FPG or OGTT) |                                                           |                                                   |
| <b>N</b>                | 6,661              | 6,525                | 4,827           | 4,827               | 4,827                                                     | 1,580                                             |
| <b>All adults</b>       | 14.3 (13.1–15.5)   | 4.2 (3.5–4.8)        | 7.5 (6.5–8.4)   | 8.7 (7.6–9.7)       | 23.0 (21.2–24.7)                                          | 37.7 (34.0–41.4)                                  |
| <b>Religion</b>         |                    |                      |                 |                     |                                                           |                                                   |
| Buddhist                | 12.0 (10.8–13.2)   | 4.2 (3.6–4.8)        | 7.4 (6.3–8.6)   | 8.5 (7.3–9.7)       | 20.5 (18.6–22.4)                                          | 41.5 (36.9–46.1)                                  |
| Hindu                   | 14.2 (10.1–18.2)   | 2.8 (1.5–4.0)        | 5.6 (3.8–7.4)   | 6.1 (4.3–7.9)       | 20.4 (16.5–24.2)                                          | 30.1 (19.9–40.2)                                  |
| Muslim                  | 29.0 (22.4–35.6)   | 4.6 (1.7–7.5)        | 10.0 (5.3–14.7) | 12.2 (7.0–17.4)     | 41.0 (32.4–49.6)                                          | 29.6 (18.3–41.0)                                  |
| Christian               | 16.9 (13.1–20.7)   | 5.9 (3.2–8.6)        | 7.7 (4.7–10.6)  | 9.9 (6.2–13.6)      | 26.2 (20.9–31.5)                                          | 37.8 (27.3–48.2)                                  |
| <b>Education</b>        |                    |                      |                 |                     |                                                           |                                                   |
| No formal schooling     | 20.2 (12.9–27.5)   | 5.6 (1.8–9.4)        | 8.1 (2.1–14.1)  | 8.8 (2.5–15.1)      | 30.5 (21.2–39.8)                                          | 28.9 (11.1–46.6)                                  |
| Primary education       | 18.2 (14.6–21.8)   | 4.1 (2.4–5.8)        | 11.0 (7.6–14.4) | 12.4 (8.8–16.1)     | 32.7 (27.3–38.0)                                          | 38.1 (28.8–47.4)                                  |
| Secondary education     | 15.4 (13.3–17.5)   | 4.4 (3.4–5.4)        | 8.0 (6.1–9.9)   | 9.2 (7.1–11.4)      | 24.2 (21.0–27.4)                                          | 38.2 (31.5–44.8)                                  |
| Passed O-level          | 14.1 (11.9–16.2)   | 3.8 (2.7–4.9)        | 6.2 (4.4–8.0)   | 7.6 (5.9–9.4)       | 21.2 (18.6–23.9)                                          | 36.0 (28.9–43.0)                                  |
| Passed A-level          | 10.3 (8.1–12.4)    | 4.6 (3.2–5.9)        | 7.2 (5.0–9.4)   | 8.1 (5.8–10.4)      | 18.4 (15.3–21.5)                                          | 44.1 (35.5–52.8)                                  |
| Degree and above        | 13.2 (8.6–17.7)    | 1.9 (0.4–3.5)        | 4.2 (0.0–8.4)   | 4.8 (0.6–9.0)       | 18.6 (11.9–25.3)                                          | 25.6 (7.4–43.8)                                   |
| <b>Area SES tertile</b> |                    |                      |                 |                     |                                                           |                                                   |
| Least developed         | 7.9 (6.5–9.4)      | 3.5 (2.8–4.3)        | 5.4 (3.8–7.0)   | 6.5 (4.9–8.1)       | 14.6 (12.2–17.0)                                          | 44.6 (36.9–52.4)                                  |
| Middle                  | 12.9 (10.8–15.0)   | 4.4 (3.4–5.5)        | 8.4 (6.6–10.2)  | 9.5 (7.4–11.6)      | 22.5 (20.0–25.1)                                          | 42.1 (33.9–50.4)                                  |
| Most developed          | 22.1 (19.9–24.2)   | 4.5 (3.1–5.9)        | 8.5 (6.8–10.2)  | 9.9 (7.8–11.9)      | 31.3 (27.7–34.9)                                          | 31.5 (26.8–36.2)                                  |
| <b>Province</b>         |                    |                      |                 |                     |                                                           |                                                   |
| Western                 | 20.0 (17.5–22.5)   | 4.5 (3.4–5.6)        | 7.6 (6.1–9.2)   | 8.9 (7.1–10.6)      | 28.9 (25.2–32.5)                                          | 30.7 (26.2–35.3)                                  |
| Central                 | 14.1 (9.7–18.6)    | 2.2 (1.6–2.9)        | 4.3 (2.4–6.3)   | 5.1 (2.7–7.5)       | 19.2 (14.7–23.7)                                          | 26.6 (12.8–40.3)                                  |
| Southern                | 10.1 (8.5–11.7)    | 4.3 (3.1–5.6)        | 8.2 (5.0–11.4)  | 8.4 (5.4–11.5)      | 18.5 (15.4–21.7)                                          | 45.5 (34.6–56.5)                                  |
| Northern                | 15.7 (10.2–21.1)   | 2.6 (0.7–4.5)        | 7.7 (4.7–10.6)  | 8.2 (5.3–11.1)      | 23.8 (18.8–28.9)                                          | 34.3 (20.8–47.8)                                  |
| Eastern                 | 13.9 (8.8–19.1)    | 6.7 (4.0–9.5)        | 7.9 (4.8–11.0)  | 10.1 (7.4–12.8)     | 24.0 (18.8–29.3)                                          | 42.0 (28.6–55.5)                                  |

|               |                 |               |                |                 |                  |                  |
|---------------|-----------------|---------------|----------------|-----------------|------------------|------------------|
| North-Western | 11.6 (7.9–15.3) | 3.4 (1.9–5.0) | 5.7 (2.9–8.5)  | 7.0 (3.6–10.4)  | 18.6 (14.6–22.6) | 37.6 (20.5–54.7) |
| North-Central | 10.8 (5.5–16.0) | 3.1 (1.2–5.0) | 5.2 (2.1–8.2)  | 5.7 (3.1–8.4)   | 16.5 (8.4–24.6)  | 34.8 (17.8–51.8) |
| Uva           | 8.6 (6.3–10.8)  | 2.0 (0.5–3.5) | 7.3 (3.4–11.3) | 7.7 (3.9–11.6)  | 16.3 (11.6–21.0) | 47.5 (38.5–56.6) |
| Sabaragamuwa  | 11.2 (7.5–14.8) | 5.2 (3.7–6.6) | 8.8 (4.2–13.4) | 10.0 (6.5–13.5) | 21.2 (15.9–26.5) | 47.3 (35.9–58.7) |

*Notes:* Estimates are given as % (95% CI). Except for the provincial estimates, all estimates are weighted as described in text to match the Sri Lankan adult population in 2019 with respect to age, sex, ethnicity, region, and area socioeconomic development. The provincial estimates are weighted similarly but matched to the profile of each province. Diagnosed diabetes was determined by self-report, review of shared medical records and medication on interview. † FPG  $\geq$ 126 mg/dl. ‡ 2-h plasma glucose  $\geq$ 200 mg/dl. § Estimates in this column have a denominator of total diabetes, whereas all other estimates use the total population as denominator.

**Table S 3. Crude prevalence of diabetes in Sri Lankan adults by age group and sex, SLHAS 2018/2019.**

| Age group (years) | Male prevalence (%) |                  | Female prevalence (%) |                  | F statistic (p-value) |
|-------------------|---------------------|------------------|-----------------------|------------------|-----------------------|
|                   | N                   | % (95% CI)       | N                     | % (95% CI)       |                       |
| 18–29             | 278                 | 4.0 (1.2–6.8)    | 338                   | 3.3 (1.1–5.5)    | 0.14 (0.706)          |
| 30–39             | 398                 | 10.5 (7.1–13.9)  | 406                   | 20.4 (16.1–24.7) | 10.75 (0.001)         |
| 40–49             | 460                 | 25.2 (20.6–29.8) | 434                   | 29.6 (23.3–35.8) | 1.24 (0.267)          |
| 50–59             | 446                 | 34.2 (28.3–40.1) | 435                   | 36.5 (30.2–42.8) | 0.32 (0.575)          |
| 60–69             | 426                 | 35.7 (30.6–40.9) | 464                   | 48.9 (43.2–54.5) | 13.54 (<0.001)        |
| 70–79             | 310                 | 35.2 (26.0–44.3) | 320                   | 39.8 (33.5–46.0) | 0.80 (0.374)          |
| 80+               | 58                  | 47.7 (29.0–66.4) | 54                    | 34.2 (18.2–50.2) | 1.05 (0.307)          |

*Notes:* Estimates are given as % (95% CI) and correspond to the values used in Supplementary Figure S2. All estimates are weighted as described in text to match the Sri Lankan adult population in 2019 with respect to age, sex, ethnicity, province, and area socioeconomic development. F statistic is for test of equal prevalence across each sex by age group.

**Table S 4. Crude prevalence of previously diagnosed diabetes, total diabetes using both FPG and OGTT, and proportion of total diabetes that is undiagnosed in Sri Lankan adults by district, SLHAS 2018/19.**

| District     | Diagnosed diabetes |                              | Undiagnosed diabetes (FPG or OGTT) |                              | Total diabetes (diagnosed and undiagnosed by FPG or OGTT) |                  |
|--------------|--------------------|------------------------------|------------------------------------|------------------------------|-----------------------------------------------------------|------------------|
|              | N                  | % (95% CI)                   | N                                  | % (95% CI)                   | N                                                         | % (95% CI)       |
| Colombo      | 600                | 24.6 (20.8–28.3)             | 435                                | 9.5 (6.0–13.0)               | 435                                                       | 34.1 (27.1–41.0) |
| Gampaha      | 464                | 16.6 (14.1–19.1)             | 334                                | 9.8 (6.3–13.3)               | 334                                                       | 26.4 (21.9–31.0) |
| Kalutara     | 367                | 15.3 (10.3–20.2)             | 230                                | 8.6 (5.0–12.2)               | 230                                                       | 23.9 (15.8–32.0) |
| Kandy        | 429                | 17.5 (11.7–23.2)             | 304                                | 4.5 (1.3–7.8)                | 304                                                       | 22.0 (16.7–27.3) |
| Matale       | 179                | 4.3 (1.8–6.8)                | 146                                | 3.6 <sup>†</sup> (-1.2–8.4)  | 146                                                       | 8.0 (0.9–15.1)   |
| Nuwara Eliya | 368                | 12.9 (3.5–22.3)              | 272                                | 5.2 (2.1–8.3)                | 272                                                       | 18.1 (8.9–27.3)  |
| Galle        | 421                | 12.1 (8.7–15.4)              | 263                                | 12.4 (8.4–16.3)              | 263                                                       | 24.4 (19.3–29.6) |
| Matara       | 250                | 10.5 (9.1–12.0)              | 109                                | 6.2 (5.9–6.6)                | 109                                                       | 16.8 (14.4–19.2) |
| Hambantota   | 180                | 6.5 (4.1–8.8)                | 97                                 | 4.1 <sup>†</sup> (-3.8–12.0) | 97                                                        | 10.7 (3.0–18.5)  |
| Jaffna       | 223                | 18.1 (6.6–29.6)              | 186                                | 12.7 (4.3–21.2)              | 186                                                       | 30.8 (19.5–42.1) |
| Mannar       | 132                | 21.0 (13.7–28.4)             | 123                                | 4.3 (2.8–5.8)                | 123                                                       | 25.3 (17.9–32.7) |
| Vavuniya     | 133                | 11.3 (6.5–16.1)              | 99                                 | 5.1 (1.1–9.1)                | 99                                                        | 16.4 (4.9–27.8)  |
| Mullaitivu   | 118                | 6.4 <sup>†</sup> (-0.5–13.2) | 108                                | 3.4 (1.8–5.0)                | 108                                                       | 9.8 (4.0–15.6)   |
| Kilinochchi  | 85                 | 8.3 (5.–11.6)                | 71                                 | 7.4 <sup>†</sup> (-1.4–16.2) | 71                                                        | 15.7 (4.6–26.8)  |
| Batticaloa   | 184                | 14.3 (8.9–19.7)              | 156                                | 10.7 (5.0–16.4)              | 156                                                       | 25.0 (18.4–31.6) |
| Ampara       | 188                | 15.0 (5.1–25.0)              | 156                                | 7.9 (4.1–11.6)               | 156                                                       | 22.9 (13.3–32.5) |
| Trincomalee  | 181                | 16.3 (12.2–20.3)             | 155                                | 12.0 (4.0–20.1)              | 155                                                       | 28.3 (20.2–36.4) |
| Kurunegala   | 361                | 12.4 (6.7–18.1)              | 289                                | 8.0 (3.0–13.0)               | 289                                                       | 20.4 (15.2–25.6) |
| Puttalam     | 187                | 10.7 (6.7–14.8)              | 163                                | 6.8 (2.9–10.8)               | 163                                                       | 17.5 (10.0–25.1) |
| Anuradhapura | 350                | 12.6 (7.2–18.0)              | 261                                | 3.8 (2.1–5.5)                | 261                                                       | 16.4 (6.9–25.9)  |
| Polonnaruwa  | 127                | 6.7 <sup>†</sup> (-6.0–19.4) | 100                                | 9.0 (3.9–14.1)               | 100                                                       | 15.7 (1.9–29.6)  |
| Badulla      | 289                | 9.3 (5.9–12.8)               | 168                                | 7.6 (2.8–12.4)               | 168                                                       | 16.9 (11.2–22.6) |
| Moneragala   | 178                | 2.9 (0.2–5.5)                | 124                                | 5.9 (2.5–9.3)                | 124                                                       | 8.7 (4.8–12.7)   |
| Ratnapura    | 363                | 11.6 (6.8–16.5)              | 230                                | 6.4 (3.1–9.8)                | 230                                                       | 18.1 (10.8–25.4) |
| Kegalle      | 304                | 9.4 (5.4–13.5)               | 248                                | 13.2 (8.0–18.3)              | 248                                                       | 22.6 (17.0–28.2) |

Notes: † Estimate not significantly different from zero, as lower bound of CI is less than zero. Estimates are weighted as described in text to match the Sri Lankan adult population in each district in 2019 with respect to age, sex, ethnicity, and area socioeconomic development.

**Table S 5. Crude prevalence of IFG, IGT, total pre-diabetes, and total diabetes and pre-diabetes in Sri Lankan adults by additional sociodemographic characteristics, SLHAS 2018/19.**

|                               | IFG <sup>†</sup> | IGT <sup>‡</sup> | Total pre-diabetes<br>(IFG or IGT) | Hyperglycemia    |
|-------------------------------|------------------|------------------|------------------------------------|------------------|
| <b>N</b>                      | 6,525            | 4,827            | 4,827                              | 4,827            |
| <b>All adults</b>             | 23.2 (21.3–25.1) | 18.9 (17.0–20.8) | 30.5 (28.2–32.7)                   | 53.4 (50.8–56.1) |
| <b>Ethnicity</b>              |                  |                  |                                    |                  |
| Sinhala                       | 24.3 (22.1–26.5) | 19.6 (17.3–21.9) | 31.9 (29.1–34.6)                   | 52.8 (49.6–56.0) |
| Tamil                         | 19.0 (15.0–23.1) | 16.9 (13.1–20.8) | 25.6 (21.8–29.5)                   | 47.2 (42.7–51.8) |
| Muslim                        | 20.7 (16.0–25.4) | 15.7 (9.5–21.8)  | 26.4 (20.1–32.8)                   | 67.2 (60.2–74.2) |
| <b>Education</b>              |                  |                  |                                    |                  |
| No formal schooling           | 29.3 (20.3–38.3) | 14.4 (7.0–21.7)  | 32.8 (22.6–42.9)                   | 63.2 (53.3–73.2) |
| Primary education             | 32.0 (27.6–36.4) | 14.3 (10.2–18.3) | 30.7 (25.1–36.3)                   | 63.3 (57.5–69.2) |
| Secondary education           | 23.2 (20.6–25.8) | 17.7 (14.9–20.4) | 29.6 (26.1–33.1)                   | 53.8 (49.8–57.9) |
| Passed O-level                | 22.1 (19.2–25.0) | 19.4 (16.0–22.7) | 31.0 (27.2–34.8)                   | 52.2 (48.3–56.2) |
| Passed A-level                | 20.3 (16.7–23.7) | 21.4 (16.8–26.1) | 30.5 (25.6–35.4)                   | 48.9 (44.1–53.7) |
| Degree and above              | 19.4 (13.2–25.7) | 27.3 (18.5–36.2) | 33.7 (25.2–42.3)                   | 52.4 (43.5–61.2) |
| <b>Sector</b>                 |                  |                  |                                    |                  |
| Urban                         | 23.4 (18.9–27.8) | 18.6 (14.0–23.2) | 28.3 (23.0–33.5)                   | 64.1 (58.6–69.6) |
| Rural                         | 23.2 (21.0–25.4) | 19.5 (17.3–21.8) | 31.3 (28.6–34.0)                   | 51.6 (48.4–54.8) |
| Estate                        | 15.2 (8.2–22.2)  | 13.0 (7.1–18.9)  | 22.6 (10.5–34.8)                   | 32.2 (21.0–43.4) |
| <b>Household SES quintile</b> |                  |                  |                                    |                  |
| Poorest                       | 25.2 (21.9–28.5) | 17.4 (14.1–20.8) | 30.1 (26.1–34.2)                   | 50.1 (44.8–55.4) |
| Poorer                        | 22.7 (19.6–25.7) | 18.3 (14.3–22.4) | 30.4 (25.8–34.9)                   | 49.8 (44.8–54.8) |
| Middle                        | 22.3 (18.9–25.7) | 17.4 (14.2–20.6) | 29.0 (24.8–33.2)                   | 51.5 (46.5–56.4) |
| Richer                        | 22.4 (19.4–25.4) | 20.1 (16.5–23.6) | 31.7 (27.4–35.9)                   | 55.6 (51.2–60.0) |
| Richest                       | 23.5 (20.5–26.5) | 20.9 (16.4–25.3) | 31.0 (26.3–35.7)                   | 59.9 (55.4–64.3) |
| <b>Area SES tertile</b>       |                  |                  |                                    |                  |
| Least developed               | 23.5 (19.7–27.3) | 17.8 (14.7–20.9) | 29.9 (26.4–33.4)                   | 44.6 (39.9–49.2) |
| Middle                        | 22.5 (19.3–25.6) | 18.5 (15.4–21.6) | 30.0 (26.1–34.0)                   | 52.6 (48.4–56.7) |



|                 |                  |                  |                  |                  |
|-----------------|------------------|------------------|------------------|------------------|
| Most developed  | 23.7 (20.2–27.1) | 20.3 (16.7–23.8) | 31.4 (26.9–35.9) | 62.7 (57.9–67.5) |
| <b>Province</b> |                  |                  |                  |                  |
| Western         | 24.2 (20.1–28.2) | 21.5 (17.5–25.5) | 33.0 (28.2–37.8) | 61.9 (56.7–67.0) |
| Central         | 24.6 (18.3–30.8) | 13.8 (9.3–18.2)  | 28.3 (21.6–35.0) | 47.5 (40.6–54.5) |
| Southern        | 26.6 (23.8–29.4) | 20.2 (14.0–26.3) | 33.6 (26.7–40.5) | 52.1 (45.3–58.9) |
| Northern        | 18.5 (13.3–23.7) | 16.2 (13.2–19.2) | 27.4 (22.4–32.4) | 51.2 (44.1–58.3) |
| Eastern         | 18.4 (14.8–22.0) | 23.6 (19.6–27.6) | 30.6 (25.8–35.5) | 54.6 (51.8–57.5) |
| North–Western   | 22.8 (18.1–27.5) | 15.2 (10.8–19.7) | 28.6 (22.2–35.1) | 47.2 (38.8–55.7) |
| North–Central   | 17.9 (10.7–25.2) | 20.8 (17.5–24.1) | 27.9 (21.1–34.7) | 44.4 (31.8–57.0) |
| Uva             | 31.4 (24.2–38.6) | 16.5 (7.5–25.5)  | 36.0 (30.2–41.9) | 52.4 (43.5–61.2) |
| Sabaragamuwa    | 20.3 (13.0–27.5) | 17.4 (14.3–20.6) | 28.7 (24.3–33.1) | 49.9 (42.8–57.0) |

*Notes:* Estimates are given as % (95% CI). All estimates are weighted as described in text to match the Sri Lankan adult population in 2019 with respect to age, sex, ethnicity, region, and area socioeconomic development, except for the estimates by province which are weighted to match the provincial populations. A residual “Other” ethnicity category and a mixed “rural/estate” sector category omitted from the table. † IFG 100–126 mg/dl. ‡ IGT 2-h plasma glucose 140–199 mg/dl.

**Figure S 1. Flowchart of subject selection and contribution of subsamples to prevalence estimates.**

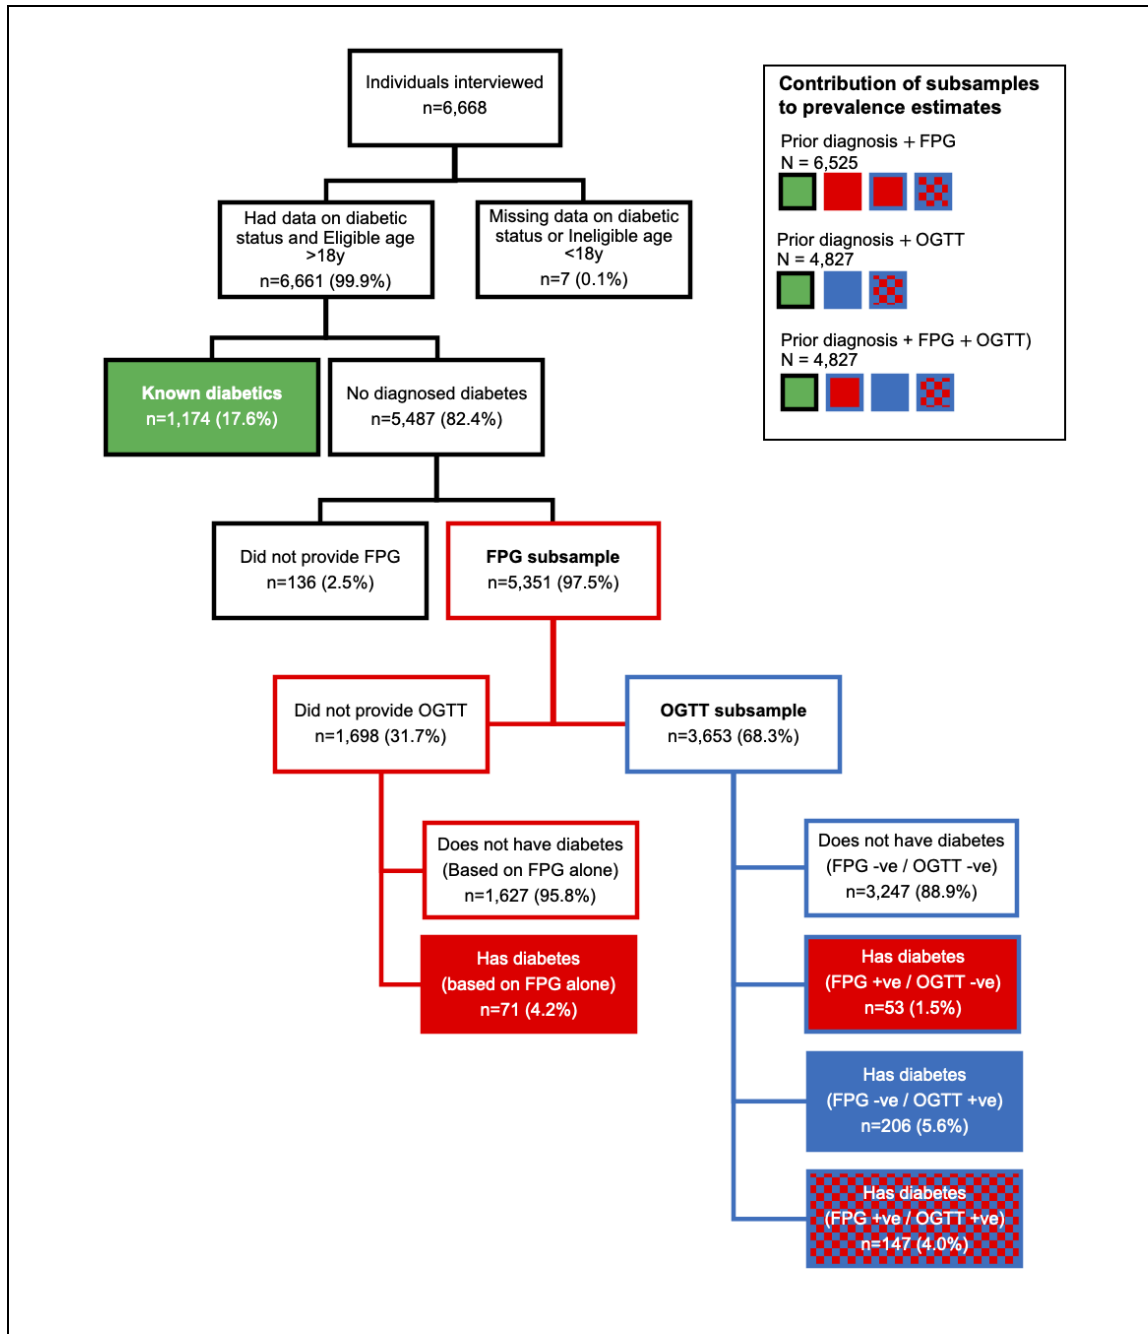

**Figure S 2. Total diabetes prevalence in Sri Lankan adults by age group and sex, SLHAS 2018/2019.**

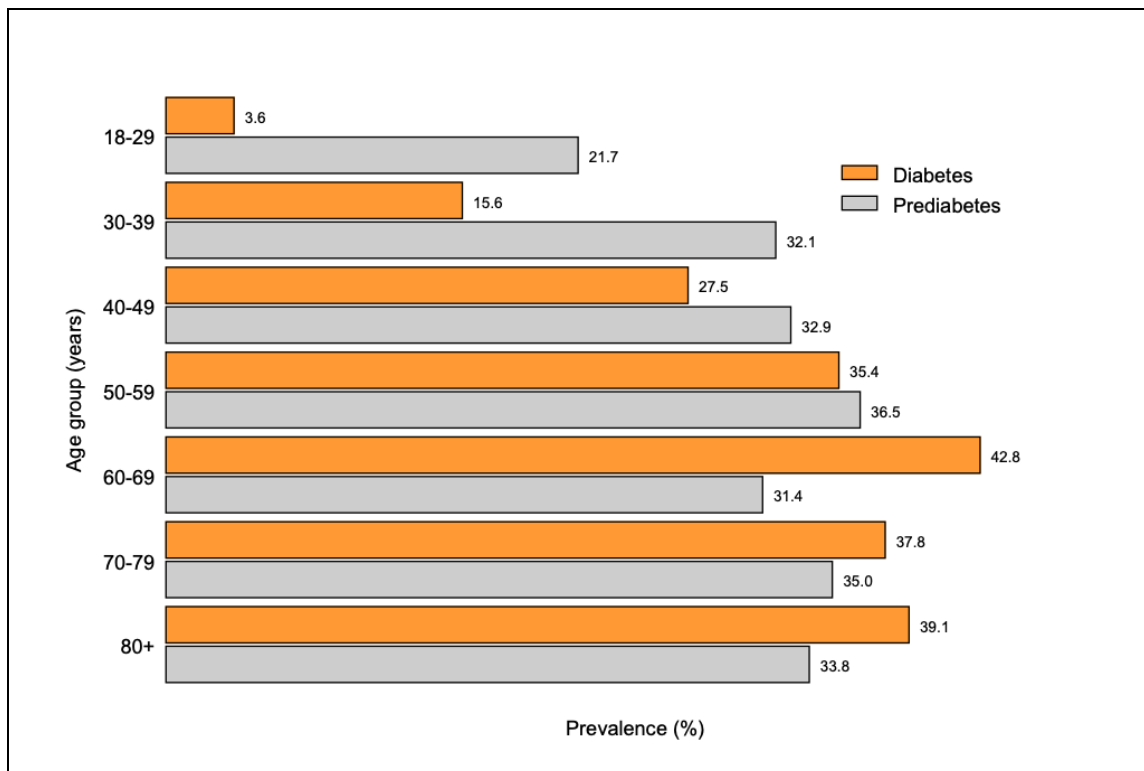

*Notes:* All estimates are weighted as described in text to match the Sri Lankan adult population in 2019 with respect to age, sex, ethnicity, province, and area socioeconomic development. Corresponding statistics with 95% confidence intervals are given in Supplementary Table S3.

**Text S 1. Estimation of household socioeconomic status using principal components analysis.**

The SLHAS Wave 1 uses an asset index approach to generate a proxy measure of each household's living standard. The index was computed by using principal components analysis (PCA) of a set of household-level variables relating to asset ownership or household characteristics. Variables were selected from those used in recent Sri Lanka Household Income and Expenditure Surveys conducted by the Department of Census and Statistics, selecting those with most predictive performance, and excluding some assets that are only relevant to agricultural households (*e.g.*, tractor, thresher, fishing equipment).

Variables were either dichotomous (*e.g.*, household has a car) or categorical (*e.g.*, type of drinking water source), apart from one ordinal variable (number of bedrooms). Dichotomous variables consisted of whether the household possessed each of the following items: radio/cassette player, television, VCD/DVD player, washing machine, fridge, electric fan, domestic phone, mobile phone, computer, internet access, camera/video camera, bicycle, motorcycle/scooter, three-wheeler, motor car/van, and bus/lorry/tipper.

Categorical variables were transformed into dichotomous indicators by creating separate dummy variables for each category. They consisted of the following (numbers in parentheses indicates number of categories in each): flooring material (5), material of wall (7), type of housing tenure (12), drinking water source (16), type of toilet (4), method of household garbage disposal (6), lighting power source (5), cooking fuel (13), and type of cooking place (3).

There was a small percentage of missing values in each variable (2–3%). These were imputed with either the PSU or stratum level mean of the variable or failing those the district/sector or national means. The principal component factor or index obtained by PCA after combining all these variables was then used to divide the sample into population weighted quantiles of equal size. Separate indices were not estimated for urban or rural sectors, but analysis indicates little difference between sectors in how the national index performs.

**Text S 2. STROBE checklist of items that should be included in reports of cross-sectional studies.**

|                              | <b>Item No</b> | <b>Recommendation</b>                                                                                                                                                                | <b>Section, paragraph Response</b>                                                                                                 |
|------------------------------|----------------|--------------------------------------------------------------------------------------------------------------------------------------------------------------------------------------|------------------------------------------------------------------------------------------------------------------------------------|
| <b>Title and abstract</b>    | 1              | (a) Indicate the study's design with a commonly used term in the title or the abstract                                                                                               | Title                                                                                                                              |
|                              |                | (b) Provide in the abstract an informative and balanced summary of what was done and what was found                                                                                  | Abstract: Background, Methods and findings, Conclusions.                                                                           |
| <b>Introduction</b>          |                |                                                                                                                                                                                      |                                                                                                                                    |
| Background/<br>rationale     | 2              | Explain the scientific background and rationale for the investigation being reported                                                                                                 | Abstract: Background. Introduction                                                                                                 |
| Objectives                   | 3              | State specific objectives, including any prespecified hypotheses                                                                                                                     | Abstract: Background. Introduction: final paragraph.                                                                               |
| <b>Methods</b>               |                |                                                                                                                                                                                      |                                                                                                                                    |
| Study design                 | 4              | Present key elements of study design early in the paper                                                                                                                              | Abstract: Methods and findings. Introduction: final paragraph. Methods: Study design and participants                              |
| Setting                      | 5              | Describe the setting, locations, and relevant dates, including periods of recruitment, exposure, follow-up, and data collection                                                      | Methods: Study design and participants. Introduction: final two paragraphs.                                                        |
| Participants                 | 6              | (a) Give the eligibility criteria, and the sources and methods of selection of participants                                                                                          | Methods: Study design and participants. Results: Characteristics of participants. Supplementary Table S1, Supplementary Figure S1. |
| Variables                    | 7              | Clearly define all outcomes, exposures, predictors, potential confounders, and effect modifiers. Give diagnostic criteria, if applicable                                             | Methods: Measures and procedures; Definitions; Prevalence estimation. Supplementary S1 Text.                                       |
| Data sources/<br>measurement | 8*             | For each variable of interest, give sources of data and details of methods of assessment (measurement). Describe comparability of assessment methods if there is more than one group | Methods: Measures and procedures; Definitions; Prevalence estimation. Supplementary S1 Text.                                       |
| Bias                         | 9              | Describe any efforts to address potential sources of bias                                                                                                                            | Methods: Measures and procedures; Prevalence estimation.                                                                           |
| Study size                   | 10             | Explain how the study size was arrived at                                                                                                                                            | Methods: Study design and participants. Results: Characteristics of participants. Supplementary Figure S1.                         |

|                        |     |                                                                                                                                                                                                     |                                                                                                                                                                   |
|------------------------|-----|-----------------------------------------------------------------------------------------------------------------------------------------------------------------------------------------------------|-------------------------------------------------------------------------------------------------------------------------------------------------------------------|
| Quantitative variables | 11  | Explain how quantitative variables were handled in the analyses. If applicable, describe which groupings were chosen and why                                                                        | Methods: Measures and procedures; Definitions; Prevalence estimation. Supplementary Text S1. Notes to Figures 1 and 2, and Supplementary Figure S2.               |
| Statistical methods    | 12  | (a) Describe all statistical methods, including those used to control for confounding                                                                                                               | Methods: Measures and procedures; Definitions; Prevalence estimation. Supplementary Text S1.                                                                      |
|                        |     | (b) Describe any methods used to examine subgroups and interactions                                                                                                                                 | Methods: Measures and procedures; Prevalence estimation.                                                                                                          |
|                        |     | (c) Explain how missing data were addressed                                                                                                                                                         | Methods: Measures and procedures; Prevalence estimation.                                                                                                          |
|                        |     | (d) If applicable, describe analytical methods taking account of sampling strategy                                                                                                                  | Methods: Measures and procedures; Prevalence estimation.                                                                                                          |
|                        |     | (e) Describe any sensitivity analyses                                                                                                                                                               | Methods: Measures and procedures; Prevalence estimation. Results: provision of separate estimates using FPG and OGTT. Tables 1 and 2.                             |
| <b>Results</b>         |     |                                                                                                                                                                                                     |                                                                                                                                                                   |
| Participants           | 13  | (a) Report numbers of individuals at each stage of study—eg numbers potentially eligible, examined for eligibility, confirmed eligible, included in the study, completing follow-up, and analysed   | Methods: Study design and participants; Measures and procedures; Prevalence estimation. Results. Tables 1 and 2. Supplementary Table S1. Supplementary Figure S1. |
|                        |     | (b) Give reasons for non-participation at each stage                                                                                                                                                | Methods: Measures and procedures; Prevalence estimation.                                                                                                          |
|                        |     | (c) Consider use of a flow diagram                                                                                                                                                                  | Supplementary Figure S1.                                                                                                                                          |
| Descriptive data       | 14* | (a) Give characteristics of study participants (eg demographic, clinical, social) and information on exposures and potential confounders                                                            | Methods: Study design and participants. Results: Characteristics of participants. Supplementary Table S1.                                                         |
|                        |     | (b) Indicate number of participants with missing data for each variable of interest                                                                                                                 | Methods: Prevalence estimation. Results: Characteristics of participants. Supplementary Table S1.                                                                 |
| Outcome data           | 15* | Report numbers of outcome events or summary measures                                                                                                                                                | Tables 1 and 2. Supplementary Table S2, and Supplementary Figure S1.                                                                                              |
| Main results           | 16  | (a) Give unadjusted estimates and, if applicable, confounder-adjusted estimates and their precision (eg, 95% confidence interval). Make clear which confounders were adjusted for and why they were | Results: Characteristics of participants.                                                                                                                         |

|                          |    |                                                                                                                                                                            |                                                                                   |
|--------------------------|----|----------------------------------------------------------------------------------------------------------------------------------------------------------------------------|-----------------------------------------------------------------------------------|
|                          |    | included                                                                                                                                                                   |                                                                                   |
|                          |    | (b) Report category boundaries when continuous variables were categorized                                                                                                  | Methods: Measures and procedures. Tables 1 and 2. Supplementary Tables S1 and S2. |
|                          |    | (c) If relevant, consider translating estimates of relative risk into absolute risk for a meaningful time period                                                           | Not Applicable.                                                                   |
| Other analyses           | 17 | Report other analyses done—eg analyses of subgroups and interactions, and sensitivity analyses                                                                             | Figures 1 and 2.                                                                  |
| <b>Discussion</b>        |    |                                                                                                                                                                            |                                                                                   |
| Key results              | 18 | Summarise key results with reference to study objectives                                                                                                                   | Abstract: Methods and findings, Conclusions. Discussion: paragraphs 1-3.          |
| Limitations              | 19 | Discuss limitations of the study, taking into account sources of potential bias or imprecision. Discuss both direction and magnitude of any potential bias                 | Abstract: Methods and findings. Discussion, paragraphs 5 and 8.                   |
| Interpretation           | 20 | Give a cautious overall interpretation of results considering objectives, limitations, multiplicity of analyses, results from similar studies, and other relevant evidence | Discussion                                                                        |
| Generalisability         | 21 | Discuss the generalisability (external validity) of the study results                                                                                                      | Discussion: paragraphs 4 and 9.                                                   |
| <b>Other information</b> |    |                                                                                                                                                                            |                                                                                   |
| Funding                  | 22 | Give the source of funding and the role of the funders for the present study and, if applicable, for the original study on which the present article is based              | Provided during submission process                                                |
